# Supplementary material for: Increased T Cell Differentiation and Cytolytic Function in Bangladeshi Compared to American Children
Source: PubMed Central journal article supplement (PMC6763580; doi:10.3389/fimmu.2019.02239), 2019-09-20
Supplement: Data_Sheet_1.pdf [file Data_Sheet_1.pdf]

## Supplementary Material

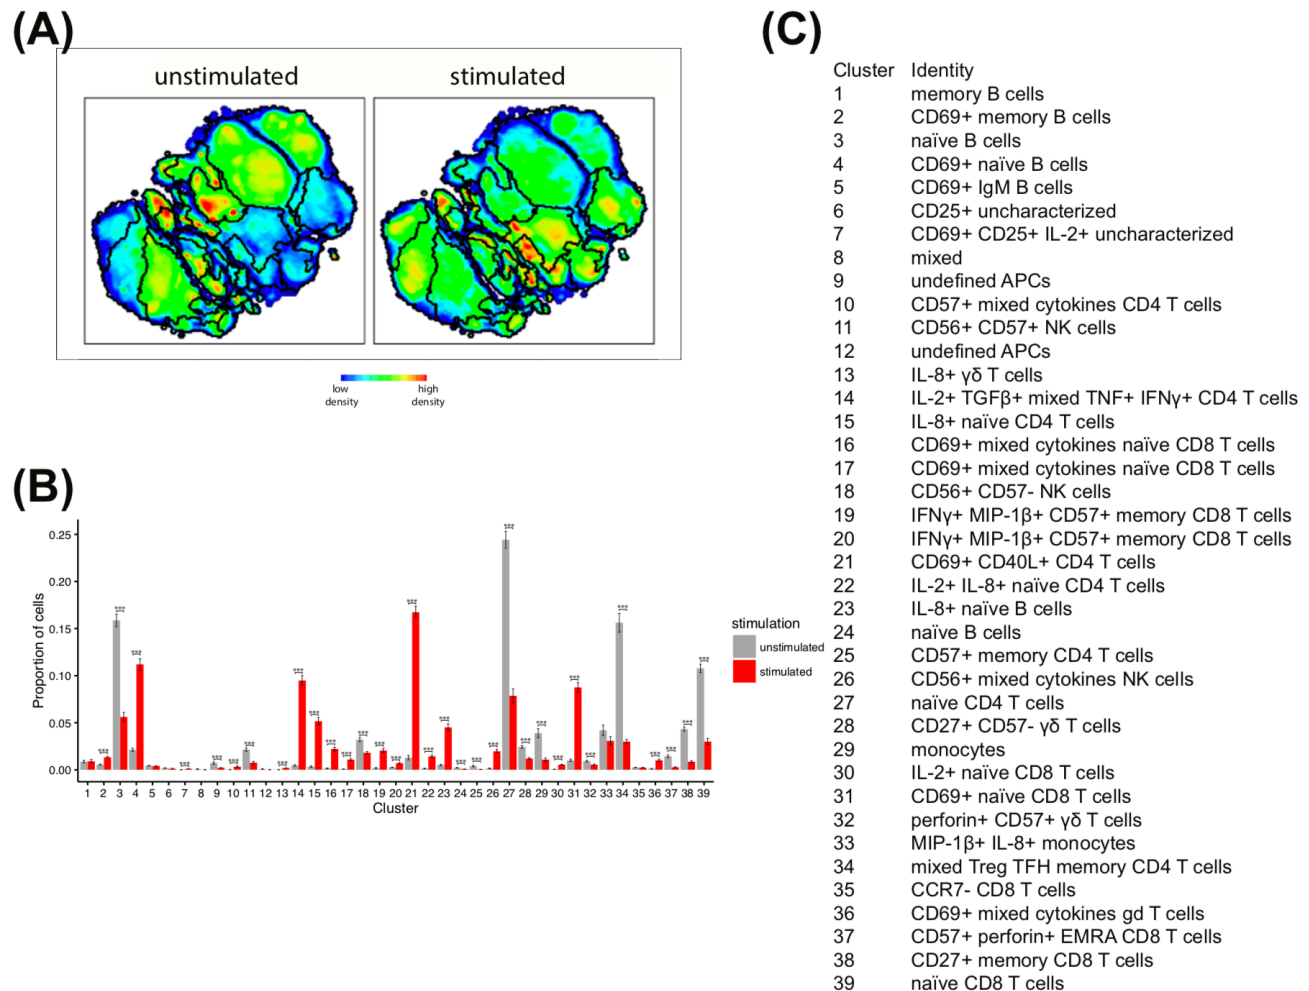

**Supplementary Figure 1. Adjacency Clustering effectively separates stimulated and unstimulated PBMC samples.** (A) AdjClust maps generated from unstimulated (left) and PMA-ionomycin stimulated (right) PBMC samples. CyTOF data includes samples from Bangladeshi children, American children, and American adults. (B) Frequency of live cells populating each cluster in unstimulated (grey) and stimulated (red) conditions. Significance levels were determined by Student's unpaired t tests followed by BH adjustment for multiple testing. All significant FDR values (\*\*\*) were less than 0.001. Values plotted are means  $\pm$  SEM. (C) Cluster profiles as determined by manual assignment.

Pooled, barcoded FCS files were pre-gated on event length, DNA intercalator, live cells, then debarcoded and exported as individual FCS files. Main population markers:

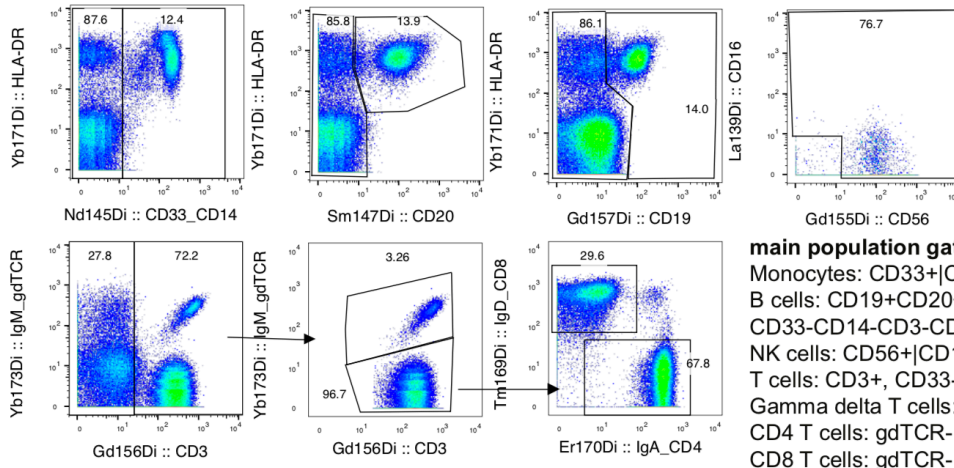

**main population gates (Boolean)**

Monocytes: CD33+|CD14+, CD20-CD19-CD56-CD3-  
 B cells: CD19+CD20+/dimHLA-DR+,  
 CD33-CD14-CD3-CD56-CD16-  
 NK cells: CD56+|CD16+, CD33-CD14-CD20-CD19-CD3-  
 T cells: CD3+, CD33-CD14-CD20-CD19-CD16-  
 Gamma delta T cells: gdTCR+  
 CD4 T cells: gdTCR- CD4+  
 CD8 T cells: gdTCR- CD8+

**sample CD4 T cell gating (unstimulated)**

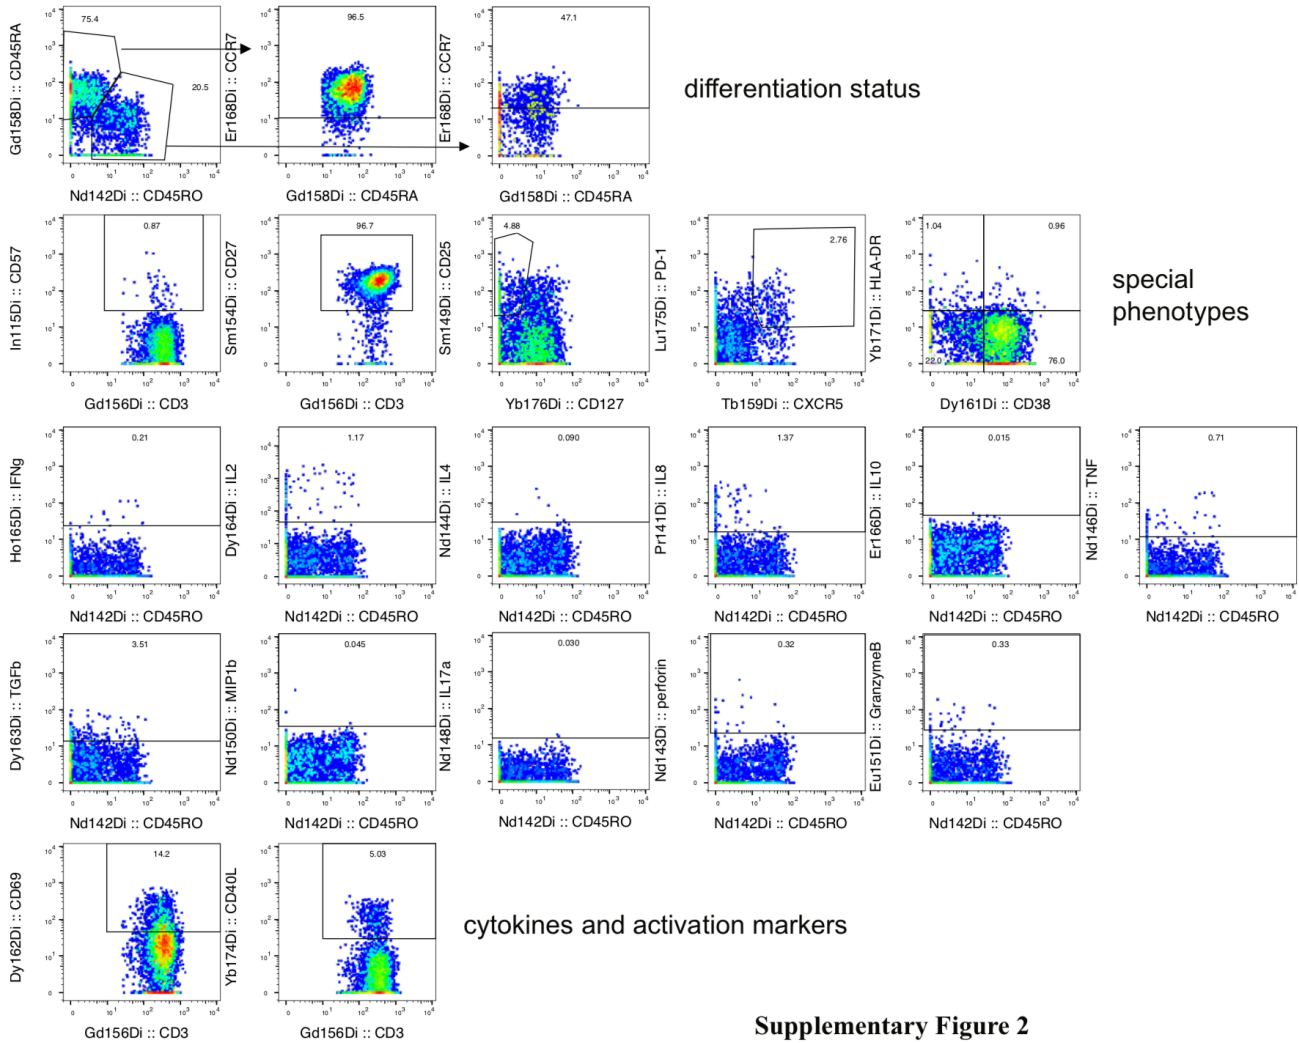

differentiation status

special phenotypes

cytokines and activation markers

**Supplementary Figure 2**  
 see next page for stimulated example and legend

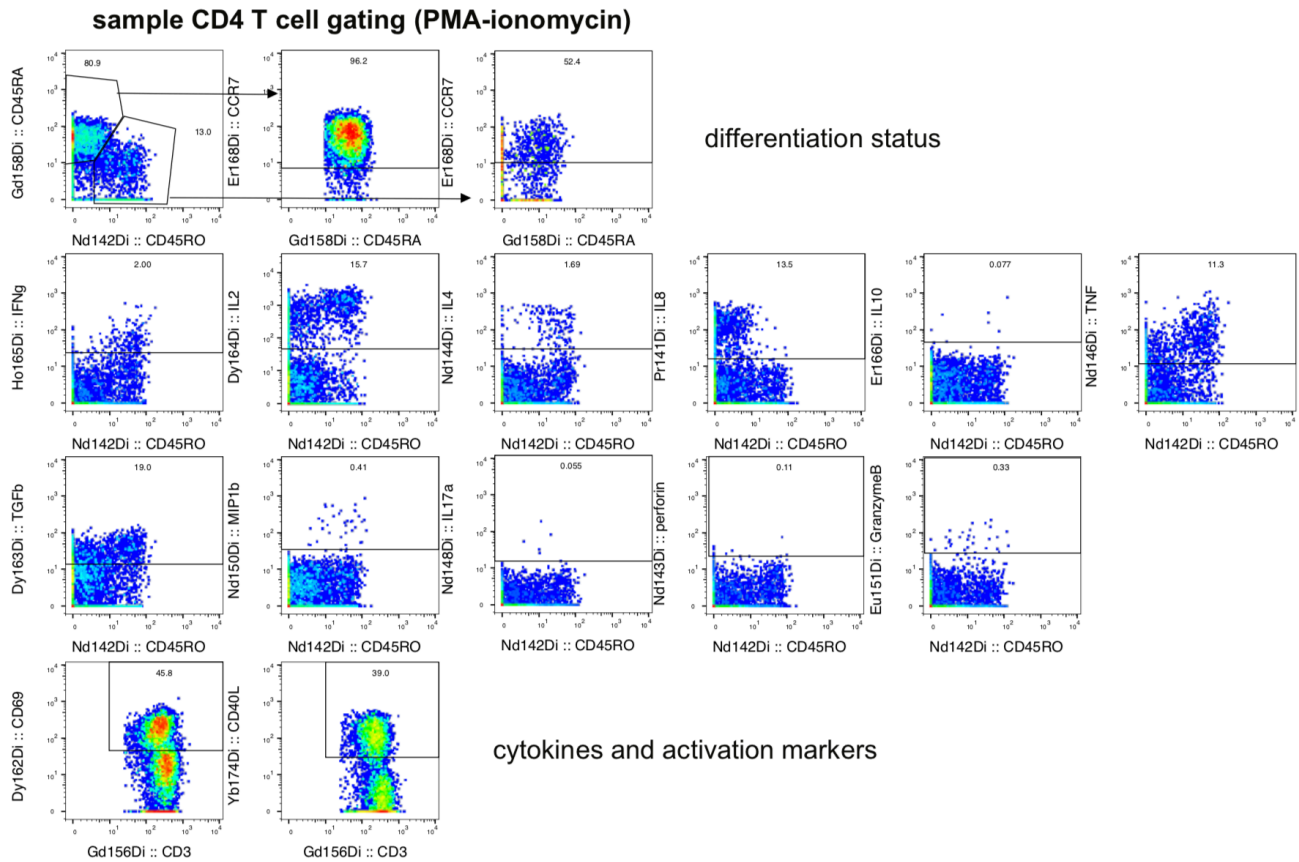

**Supplementary Figure 2. Manual gating strategy for main cell populations with Boolean gating strategy and sample staining from CD4 T cells for phenotype and cytokine analysis in unstimulated and stimulated cells.**

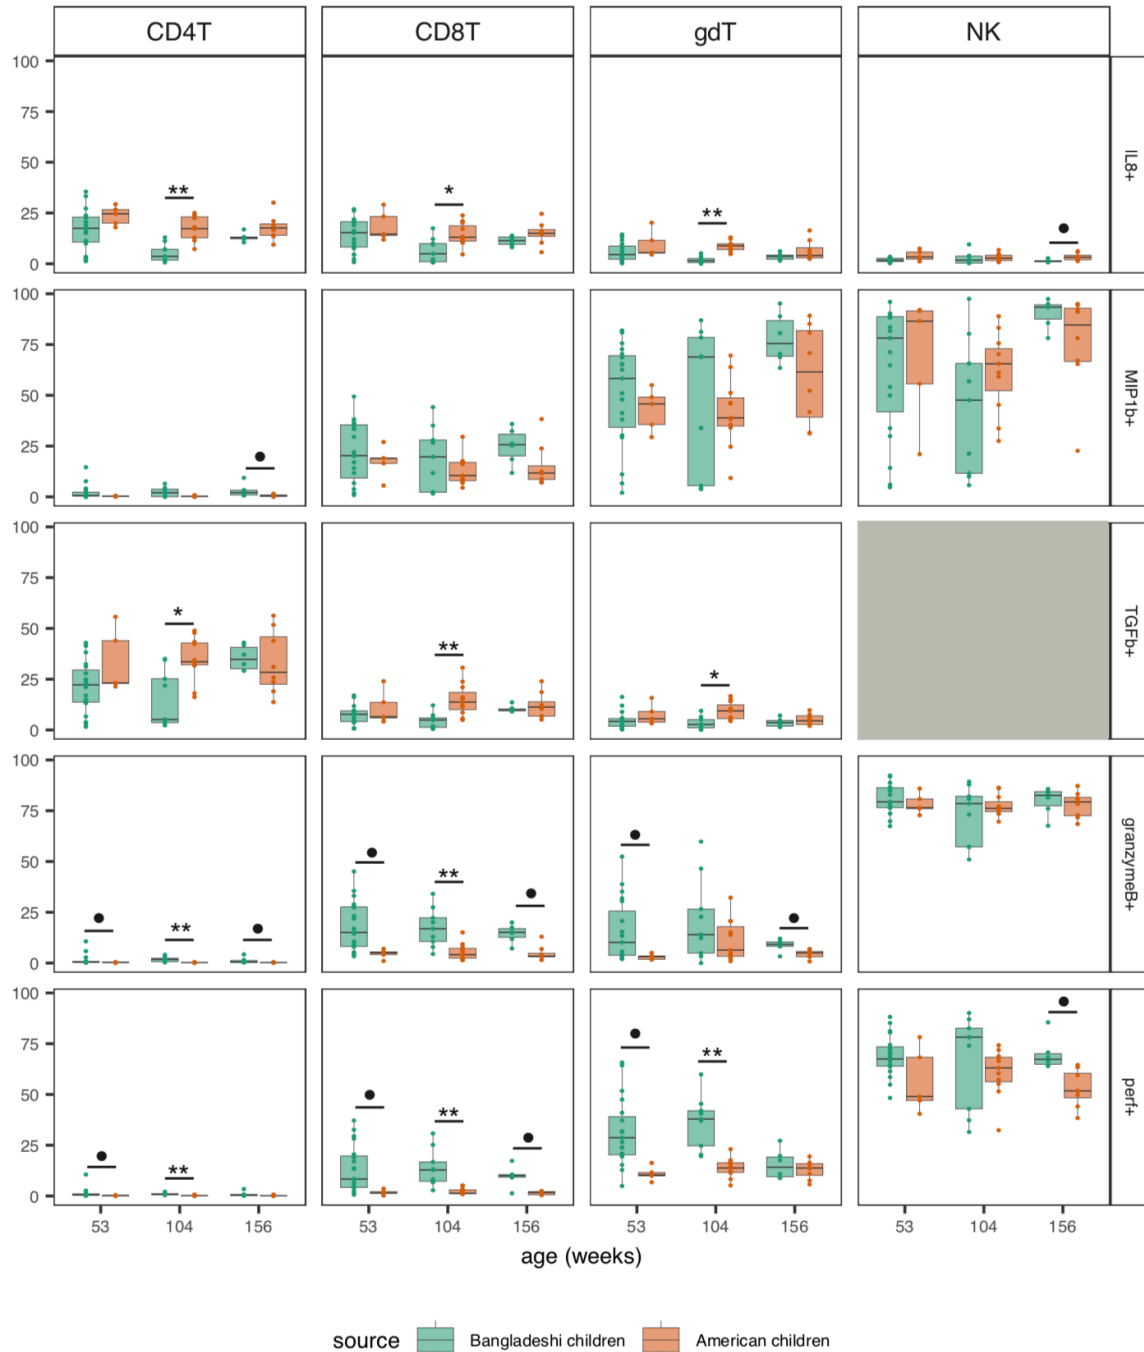

**Supplementary Figure 3. Manual gating analysis of select cytokines from CD4 T, CD8 T, gamma delta T, and NK cell populations after PMA-ionomycin stimulation.** To compare Bangladeshi and American children's immune cell populations from manual gating, Mann-Whitney tests were performed for each population and time point shown. *p* values were then corrected for multiple testing using the Benjamini & Hochberg method. Significant differences in cell frequencies between Bangladeshi and American children's samples are indicated as FDR < 0.1 (•), FDR < 0.05 (\*), FDR < 0.01 (\*\*), FDR < 0.001 (\*\*\*). Values plotted are means +/- SEM.

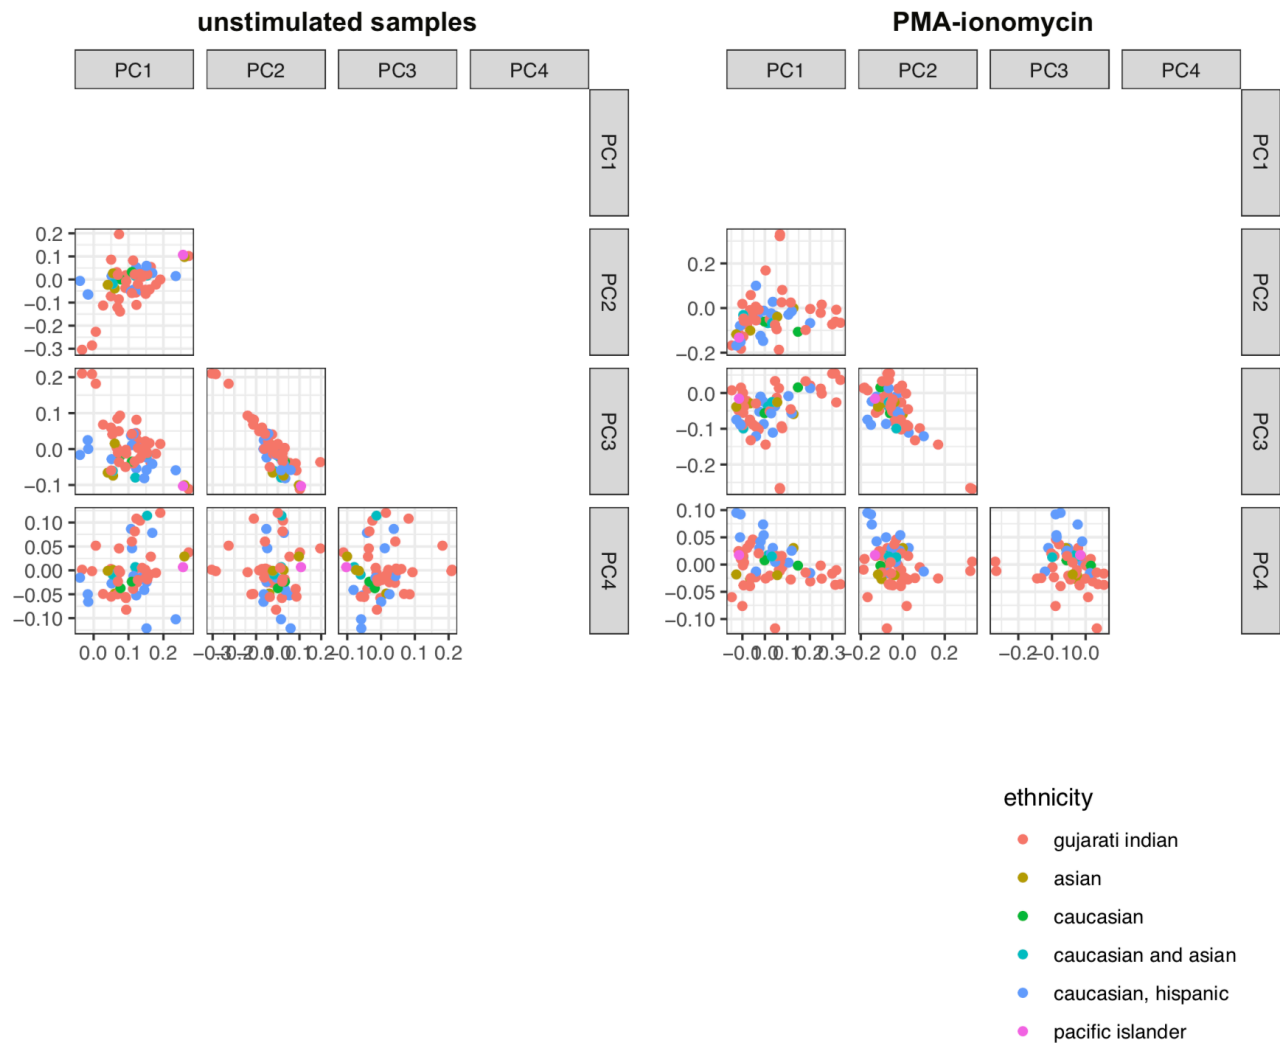

**Supplementary Figure 4. Principal component analysis on AdjClust clustering groups from unstimulated and PMA-ionomycin stimulated samples.** The first four components are shown plotted against one another for each stimulation condition with sample colors assigned based on ethnicity. All donors with ethnicity “Gujarati Indian” come from the Bangladeshi cohort.

**Supplementary Table 1. Manually assigned definitions for clusters generated with AdjClust.** Cluster assignments were made for **(A)** unstimulated and **(B)** PMA-ionomycin stimulated cluster maps based on marker heatmap expression and examination of individual marker intensities plotted as overlays on tSNE maps.

**(A)**

| cluster | stimulation | definition        | cellType    |
|---------|-------------|-------------------|-------------|
| 1       | none        | CD57+ CD4T        | CD4 T cells |
| 2       | none        | EMRA gdT          | gd T cells  |
| 3       | none        | naive CD4T        | CD4 T cells |
| 4       | none        | EMRA gdT          | gd T cells  |
| 5       | none        | CD57+ perf+ NK    | NK cells    |
| 6       | none        | EMRA CD8+ gdT     | gd T cells  |
| 7       | none        | CD57+ perf+ NK    | NK cells    |
| 8       | none        | EMRA CD8T         | CD8 T cells |
| 9       | none        | perf+ NK          | NK cells    |
| 10      | none        | NK                | NK cells    |
| 11      | none        | EMRA CD8T         | CD8 T cells |
| 12      | none        | naive CD8T        | CD8 T cells |
| 13      | none        | naive CD8T        | CD8 T cells |
| 14      | none        | EMRA gdT          | gd T cells  |
| 15      | none        | naive B           | B cells     |
| 16      | none        | naive Treg        | CD4 T cells |
| 17      | none        | naive B           | B cells     |
| 18      | none        | memory B          | B cells     |
| 19      | none        | CD27+ memory CD4T | CD4 T cells |
| 20      | none        | memory Treg       | CD4 T cells |
| 21      | none        | GzB+ CD8T         | CD8 T cells |
| 22      | none        | CD27- memory CD4T | CD4 T cells |
| 23      | none        | CD56+ CD8T        | CD8 T cells |
| 24      | none        | memory CD8T       | CD8 T cells |
| 25      | none        | naive B           | B cells     |
| 26      | none        | monocytes         | monocytes   |
| 27      | none        | monocytes         | monocytes   |
| 28      | none        | monocytes         | monocytes   |

**(B)**

| cluster | stimulation | definition               | cellType    |
|---------|-------------|--------------------------|-------------|
| 1       | PMA-iono    | non-activated CD4T       | CD4 T cells |
| 2       | PMA-iono    | non-activated CD8T       | CD8 T cells |
| 3       | PMA-iono    | activated CD8T           | CD8 T cells |
| 4       | PMA-iono    | CD40L+ CD4T              | CD4 T cells |
| 5       | PMA-iono    | CD40L+ CD4T              | CD4 T cells |
| 6       | PMA-iono    | non-activated Treg       | CD4 T cells |
| 7       | PMA-iono    | IL8+ CD8T                | CD8 T cells |
| 8       | PMA-iono    | CD40L+IL8+ CD4T          | CD4 T cells |
| 9       | PMA-iono    | IL8+ MIP1b+ mono         | monocytes   |
| 10      | PMA-iono    | MIP1b+ CD8T              | CD8 T cells |
| 11      | PMA-iono    | MIP1b+GzB+perf+TNF+ gdT  | gd T cells  |
| 12      | PMA-iono    | TGFb+ Treg               | CD4 T cells |
| 13      | PMA-iono    | activated B              | B cells     |
| 14      | PMA-iono    | non-activated gdT        | gd T cells  |
| 15      | PMA-iono    | activated B              | B cells     |
| 16      | PMA-iono    | MIP1b+GzB+perf+TNF+ CD4T | CD4 T cells |
| 17      | PMA-iono    | MIP1b+GzB+perf+TNF+ gdT  | gd T cells  |
| 18      | PMA-iono    | IL2+CD40L+TGFb+ CD4T     | CD4 T cells |
| 19      | PMA-iono    | non-activated CD8T       | CD8 T cells |
| 20      | PMA-iono    | IL2+MIP1b+ CD8T          | CD8 T cells |
| 21      | PMA-iono    | IL2+CD40L+TGFb+ CD4T     | CD4 T cells |
| 22      | PMA-iono    | MIP1b+ NK                | NK cells    |
| 23      | PMA-iono    | IL2+MIP1b+TNF+ CD8T      | CD8 T cells |
| 24      | PMA-iono    | activated gdT            | gd T cells  |
| 25      | PMA-iono    | IL8+ B                   | B cells     |
| 26      | PMA-iono    | MIP1b+GzB+perf+TNF+ CD8T | CD8 T cells |
| 27      | PMA-iono    | MIP1b+GzB+perf+ NK       | NK cells    |
| 28      | PMA-iono    | non-activated B          | B cells     |
| 29      | PMA-iono    | IL8+ MIP1b+ mono         | monocytes   |
| 30      | PMA-iono    | MIP1b+GzB+perf+ NK       | NK cells    |

**Supplementary Table 2. CyTOF staining panel and reagent sources.**

| label | polymer     | marker              | clone name | clone source | surface stain      | IC stain |
|-------|-------------|---------------------|------------|--------------|--------------------|----------|
| 104Pd | SCN-Bn-EDTA | CD45                | HI30       | Biolegend    | x                  |          |
| 106Pd | SCN-Bn-EDTA | CD45                | HI30       | Biolegend    | x                  |          |
| 108Pd | SCN-Bn-EDTA | CD45                | HI30       | Biolegend    | x                  |          |
| 113In | DN3         | CD45                | HI30       | Biolegend    | x                  |          |
| 115In | X8          | CD57                | HCD57      | Biolegend    | x                  |          |
| 139La | X8          | CD16                | 3G8        | Biolegend    | x                  |          |
| 141Pr | X8          | IL-8                | BH0814     | Biolegend    |                    | x        |
| 142Nd | X8          | CD45RO              | UCHL1      | Biolegend    | x                  |          |
| 143Nd | X8          | perforin            | B-D48      | Abcam        |                    | x        |
| 144Nd | X8          | IL-4                | MP4-25D2   | Fluidigm     |                    | x        |
| 145Nd | X8          | CD33                | WM53       | Biolegend    | x                  |          |
| 145Nd | X8          | CD14                | M5E2       | Biolegend    | x                  |          |
| 146Nd | X8          | TNF                 | MAb11      | Fluidigm     |                    | x        |
| 147Sm | X8          | CD20                | 2H7        | Biolegend    | x                  |          |
| 148Nd | X8          | IL-17a              | BL168      | Fluidigm     |                    | x        |
| 149Sm | X8          | CD25                | 2A3        | Fluidigm     | x                  |          |
| 150Nd | DN3         | MIP-1 $\beta$       | D21-1351   | BD           |                    | x        |
| 151Eu | DN3         | Granzyme B          | GB11       | BD           |                    | x        |
| 152Sm | DN3         | CD103               | B-Ly7      | eBioscience  | x                  |          |
| 153Eu | DN3         | CD107a              | H4A3       | BD           | during stimulation |          |
| 153Eu | DN3         | CD107b              | H4B4       | BD           | during stimulation |          |
| 154Sm | DN3         | CD27                | LG.7F9     | eBioscience  | x                  |          |
| 155Gd | X8          | CD56                | NCAM16.2   | BD           | x                  |          |
| 156Gd | X8          | CD3                 | UCHT1      | Biolegend    | x                  |          |
| 157Gd | DN3         | CD19                | HIB19      | Biolegend    | x                  |          |
| 158Gd | X8          | CD45RA              | HI100      | Biolegend    | x                  |          |
| 159Tb | X8          | CXCR5               | RF8B2      | BD           | x                  |          |
| 160Gd | DN3         | CD28                | CD28.2     | Biolegend    | x                  |          |
| 161Dy | X8          | CD38                | HIT2       | Biolegend    | x                  |          |
| 162Dy | X8          | CD69                | FN50       | Fluidigm     |                    | x        |
| 163Dy | X8          | TGF $\beta$ 1 (LAP) | TW4-6H10   | Biolegend    |                    | x        |
| 164Dy | X8          | IL-2                | MQ1-17H12  | eBioscience  |                    | x        |
| 165Ho | X8          | IFN $\gamma$        | B27        | Fluidigm     |                    | x        |
| 166Er | X8          | IL-10               | JES3-9D7   | Fluidigm     |                    | x        |
| 167Er | X8          | Integrin $\beta$ 7  | FIB504     | Biolegend    | x                  |          |
| 168Er | DN3         | CCR7                | G043H7     | Biolegend    | x                  |          |
| 169Tm | X8          | CD8                 | SK1        | Biolegend    | x                  |          |
| 169Tm | X8          | IgD                 | IA6-2      | Biolegend    | x                  |          |
| 170Er | X8          | CD4                 | SK3        | Biolegend    | x                  |          |
| 170Er | X8          | IgA                 | G18-1      | BD           | x                  |          |
| 171Yb | X8          | HLA-DR              | L243       | Biolegend    | x                  |          |
| 172Yb | X8          | LRP1                | 545503     | R&D          |                    | x        |
| 173Yb | X8          | TCR $\gamma\delta$  | 5A6.E9     | in-house     | x                  |          |
| 173Yb | X8          | IgM                 | G20-127    | BD           | x                  |          |
| 174Yb | X8          | CD40L               | 24-31      | Biolegend    |                    | x        |
| 175Lu | X8          | PD-1                | EH12.2H7   | Fluidigm     | x                  |          |
| 176Yb | X8          | CD127               | A019D5     | Biolegend    | x                  |          |
| 191Ir | N/A         | DNA1                | -          | Fluidigm     |                    | x        |
| 193Ir | N/A         | DNA2                | -          | Fluidigm     |                    | x        |
| 195Pt | N/A         | cisplatin           | -          | Fluidigm     | x                  |          |

**Supplementary Table 3. Markers used for tSNE preparation and relative weightings assigned for AdjClust clustering.** For both unstimulated and PMA-ionomycin stimulated clustering, the minimum cluster size was set to 1,500 cells.

| marker     | stimulation | weight |
|------------|-------------|--------|
| CCR7       | no stim     | 100    |
| CD127      | no stim     | 70     |
| CD16       | no stim     | 90     |
| CD19       | no stim     | 100    |
| CD20       | no stim     | 100    |
| CD25       | no stim     | 130    |
| CD27       | no stim     | 130    |
| CD3        | no stim     | 100    |
| CD33+CD14  | no stim     | 100    |
| CD38       | no stim     | 50     |
| CD45RA     | no stim     | 110    |
| CD45RO     | no stim     | 150    |
| CD56       | no stim     | 100    |
| CD57       | no stim     | 100    |
| granzyme B | no stim     | 100    |
| HLA-DR     | no stim     | 90     |
| IgA+CD4    | no stim     | 90     |
| IgD+CD8    | no stim     | 110    |
| IgM_gdTCR  | no stim     | 120    |
| perforin   | no stim     | 100    |

| marker        | stimulation | weight |
|---------------|-------------|--------|
| CCR7          | PMA-iono    | 10     |
| CD107a+CD107b | PMA-iono    | 40     |
| CD127         | PMA-iono    | 0      |
| CD16          | PMA-iono    | 20     |
| CD19          | PMA-iono    | 100    |
| CD20          | PMA-iono    | 100    |
| CD25          | PMA-iono    | 120    |
| CD27          | PMA-iono    | 130    |
| CD3           | PMA-iono    | 120    |
| CD33+CD14     | PMA-iono    | 100    |
| CD38          | PMA-iono    | 10     |
| CD40L         | PMA-iono    | 90     |
| CD45RA        | PMA-iono    | 120    |
| CD45RO        | PMA-iono    | 100    |
| CD56          | PMA-iono    | 100    |
| CD57          | PMA-iono    | 100    |
| CD69          | PMA-iono    | 130    |
| granzyme B    | PMA-iono    | 110    |
| HLA-DR        | PMA-iono    | 80     |
| IFNg          | PMA-iono    | 130    |
| IgA+CD4       | PMA-iono    | 120    |
| IgD+CD8       | PMA-iono    | 130    |
| IgM+gdTCR     | PMA-iono    | 90     |
| IL-2          | PMA-iono    | 130    |
| IL-8          | PMA-iono    | 130    |
| MIP-1b        | PMA-iono    | 110    |
| perforin      | PMA-iono    | 100    |
| TGFb          | PMA-iono    | 60     |
| TNF           | PMA-iono    | 110    |
